# Supplementary material for: Oral Anticoagulant Therapy—When Art Meets Science
Source: PubMed Central journal article supplement (PMC6832236; doi:10.3390/jcm8101747), 2019-10-21
Supplement: jcm-08-01747-s001.pdf [file jcm-08-01747-s001.pdf]

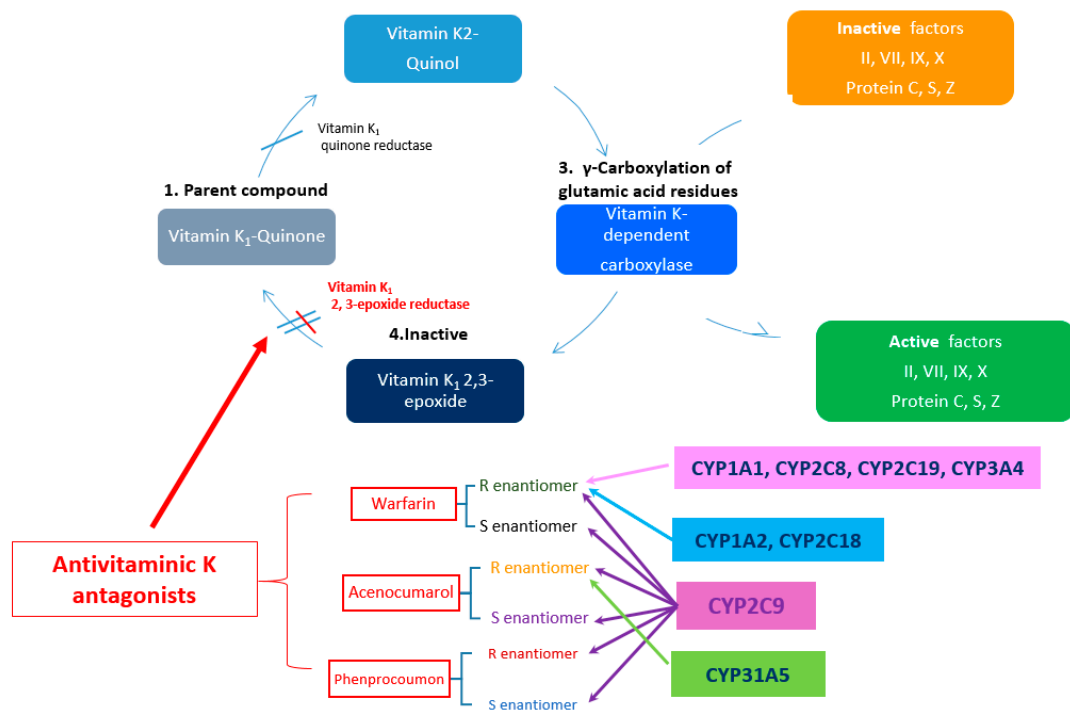

**Figure S1. Mechanism of action of antivitaminic K antagonists.** CYP1A1 Cytochrome P450 family 1, subfamily A, polypeptide 1; CYP1A2 Cytochrome P450 family 1, subfamily A, polypeptide 2; CYP2C18 Cytochrome P450 family 2, subfamily C, polypeptide 18; CYP2C19 Cytochrome P450 family 2, subfamily C, polypeptide 19; CYP3A4 Cytochrome P450 family 3, subfamily A, polypeptide 4; CYP2C9 Cytochrome P450 family 2, subfamily C, polypeptide 9; CYP2C3A5 Cytochrome P450 family 3, subfamily A, polypeptide 5. Adapted after [19] [20]

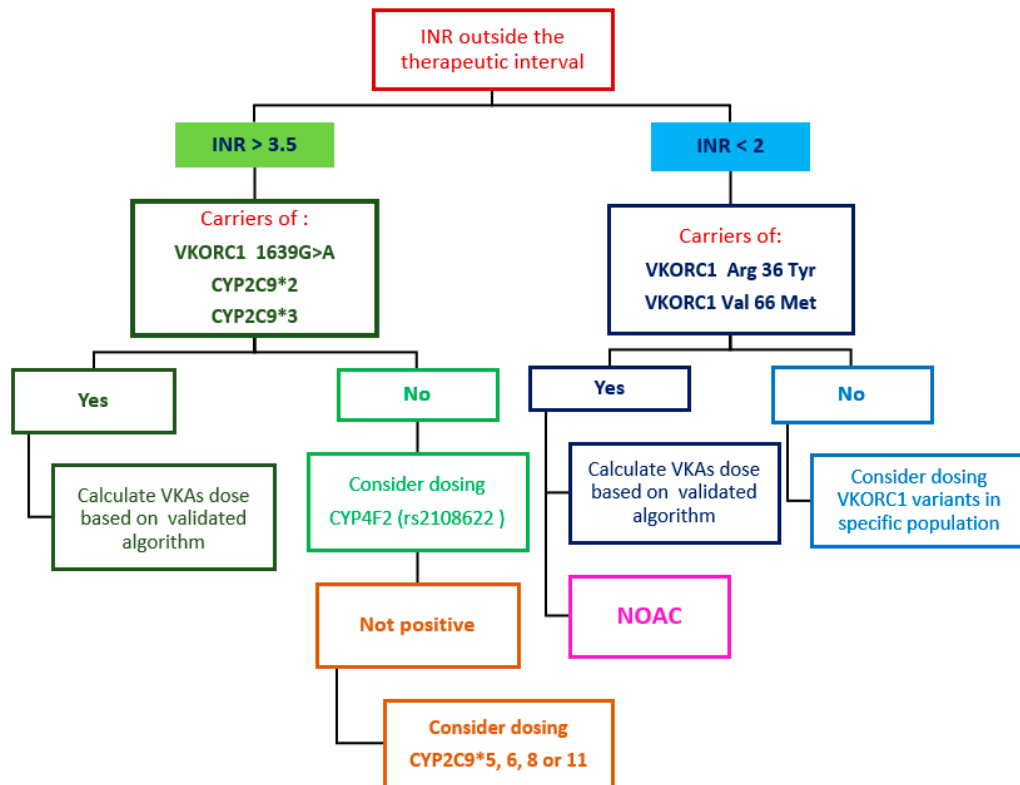

Figure S2. Proposed algorithm for managing INR variability after excluding environmental factors. Adapted after [71]
